# Supplementary material
Source: Royal Society of Chemistry journal article supplement (doi:10.1039/d6tc01113f)
Supplement: d6tc01113f1.pdf [file d6tc01113f1.pdf]

**Visual detection of topology freezing transition temperature of vitrimers based on fluorescein-soaked coatings from photonic crystals and vitrimers**

Chengjia Xiong,<sup>1,2,3†\*</sup> Qiang Tan,<sup>1,2†</sup> Zihan Yang<sup>1,2†</sup>

<sup>1</sup>School of Building and Materials Engineering, Hubei University of Education, Wuhan 430205, P. R. China

<sup>2</sup>College of Advanced Energy Materials, Hubei University of Education, Wuhan 430205, P. R. China

<sup>3</sup>Hubei Engineering Technology Research Center of Environmental Purification Materials, Hubei University of Education, 430205 Wuhan, P. R. China

\*Corresponding author

E-mail: [cjxiong@iccas.ac.cn](mailto:cjxiong@iccas.ac.cn)

†These authors contributed equally to this work.

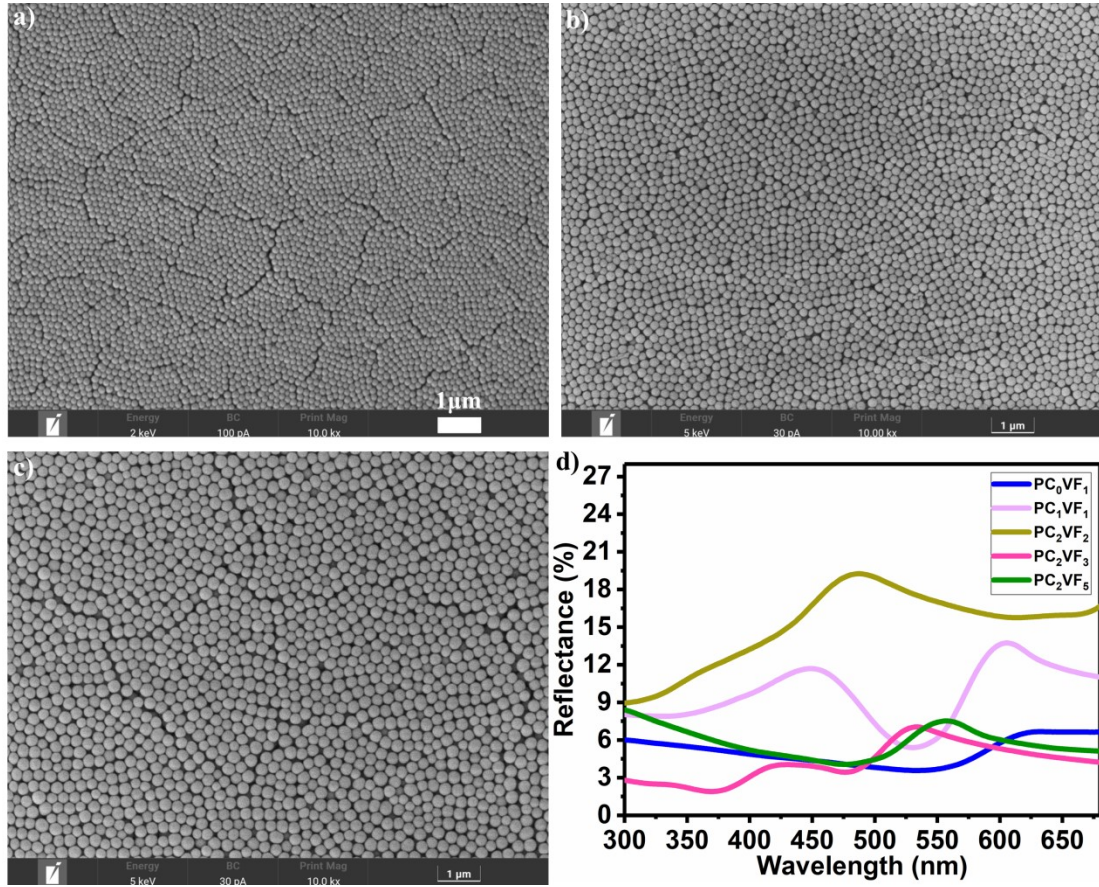

**Figure S1** SEM images of a) PC<sub>1</sub>, b) PC<sub>2</sub> and c) PC<sub>4</sub>. d) Reflection spectra of the representative PCVF coatings under natural light.

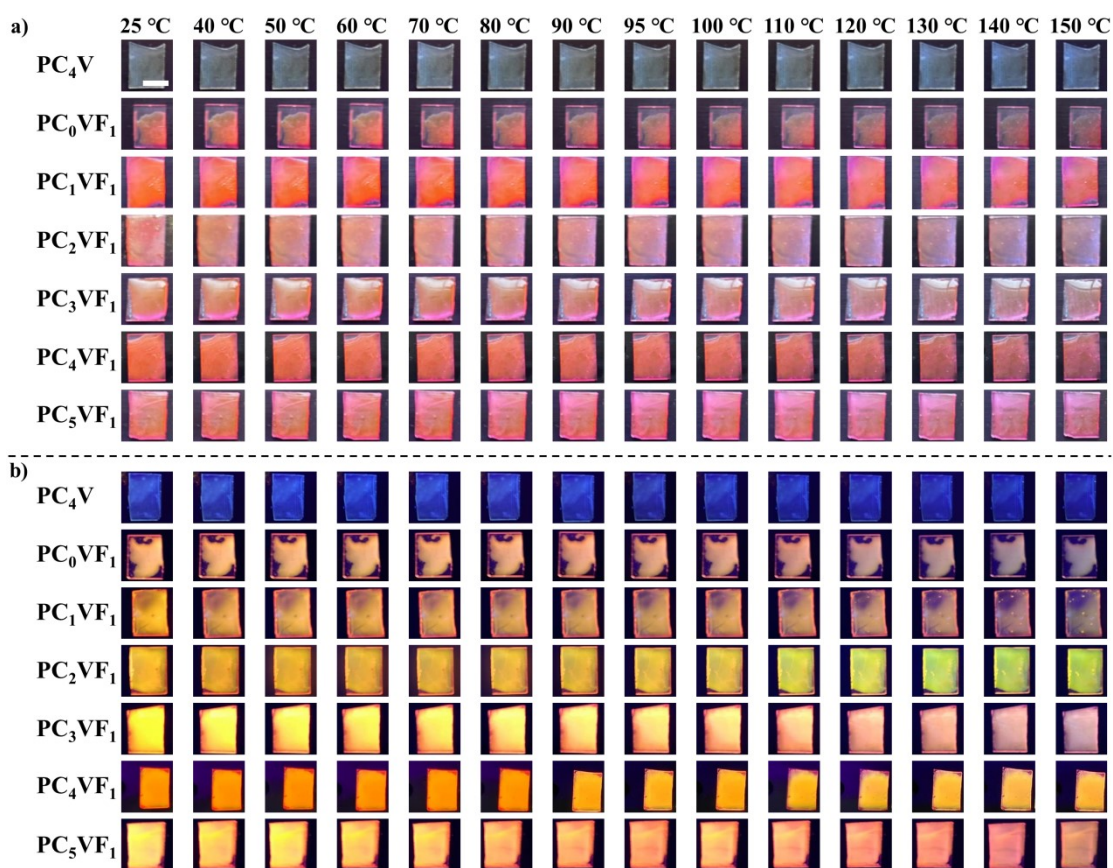

**Figure S2** The whole photographs of PC<sub>4</sub>V, PC<sub>0</sub>VF<sub>1</sub> and PC<sub>1</sub>VF<sub>1</sub>~PC<sub>5</sub>VF<sub>1</sub> at different temperatures under a) natural light and b) UV light. Scale bar: 1 cm.

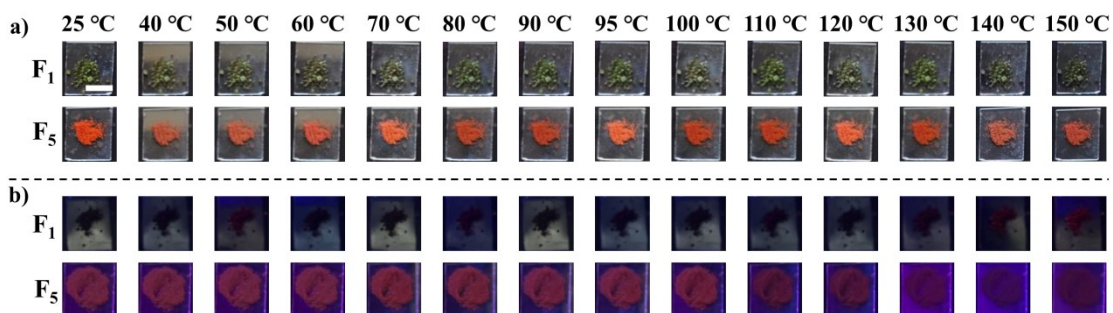

**Figure S3** Photographs of the representative solid fluorescein (F<sub>1</sub>=rhodamine B and F<sub>5</sub>=fluorescein isothiocyanate isomer I) at different temperatures under a) natural light and b) UV light. Scale bar: 1 cm.

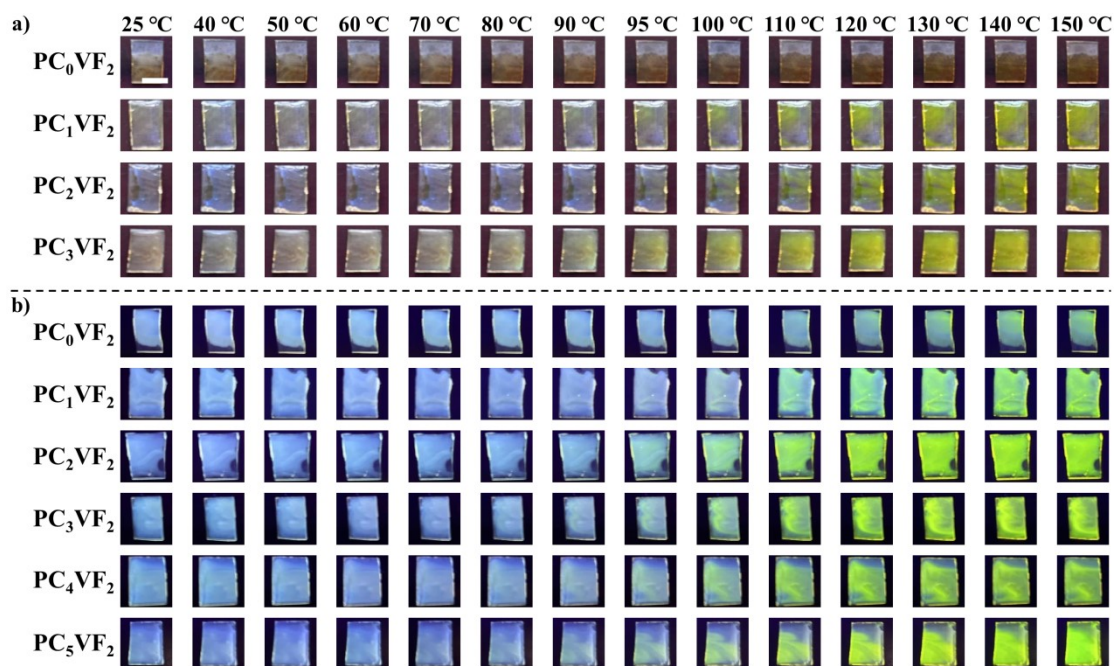

**Figure S4** The whole photographs of PCVF soaked with fluorescein diacetate at different temperatures. a) Photographs of  $PC_0VF_2$  and the representative  $PC_1VF_2 \sim PC_3VF_2$  coatings under natural light. b) Photographs of  $PC_0VF_2$ ,  $PC_1VF_2 \sim PC_5VF_2$  coatings under UV light. Scale bar: 1 cm.

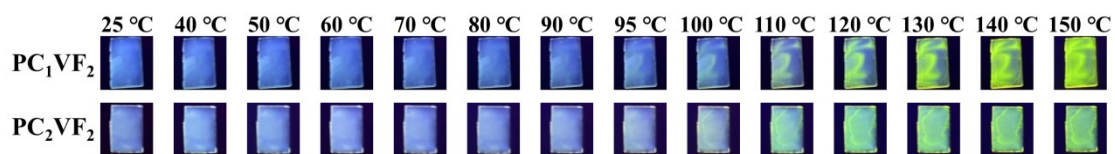

**Figure S5** The representative repeated experiments: the whole photographs of  $PC_1VF_2$  and  $PC_2VF_2$  at different temperatures under UV light. Scale bar: 1 cm.

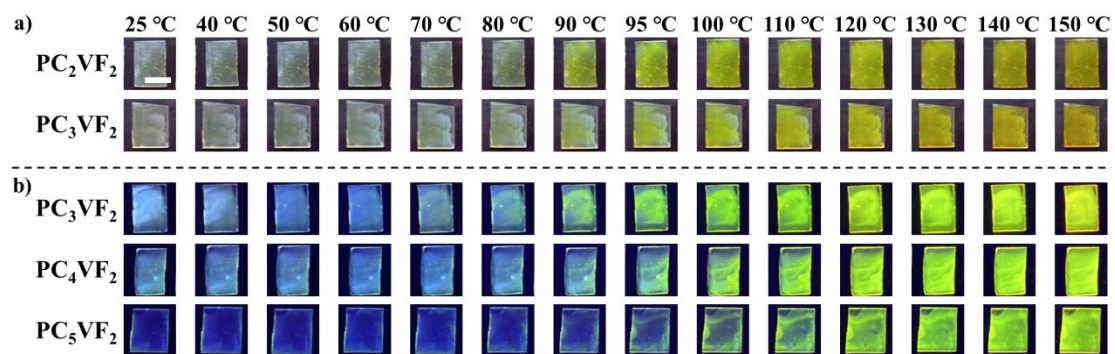

**Figure S6** Photographs of the representative PCVF soaked with high concentration fluorescein diacetate methylbenzene solution (0.1 g/50 mL) at different temperatures under a) natural light and b) UV light. Scale bar: 1 cm.

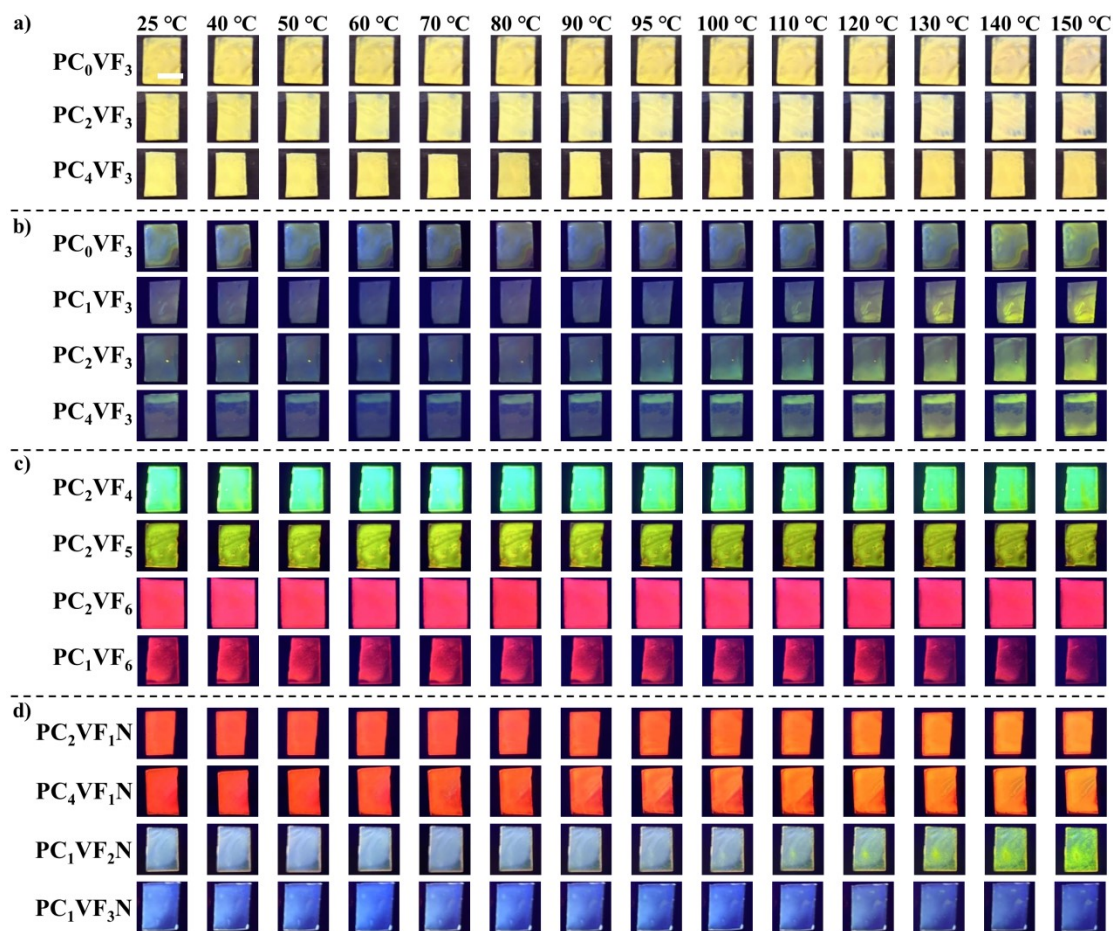

**Figure S7** The whole photographs of the representative PCVF coatings at different temperatures. a) Photographs of PC<sub>0</sub>VF<sub>3</sub>, PC<sub>2</sub>VF<sub>3</sub> and PC<sub>4</sub>VF<sub>3</sub> coatings under natural light. b) Photographs of PC<sub>0</sub>VF<sub>3</sub>, PC<sub>1</sub>VF<sub>3</sub>, PC<sub>2</sub>VF<sub>3</sub> and PC<sub>4</sub>VF<sub>3</sub> coatings under UV light. c) Photographs of the PCV soaked in fluorescein without ester group (PC<sub>4</sub>VF<sub>4</sub>, PC<sub>2</sub>VF<sub>5</sub>, PC<sub>2</sub>VF<sub>6</sub> and PC<sub>1</sub>VF<sub>6</sub>) under UV light. d) Photographs of the PCVF soaked in NaOH solution (PC<sub>2</sub>VF<sub>1</sub>N, PC<sub>4</sub>VF<sub>1</sub>N, PC<sub>1</sub>VF<sub>2</sub>N and PC<sub>1</sub>VF<sub>3</sub>N) under UV light. Scale bar: 1 cm.

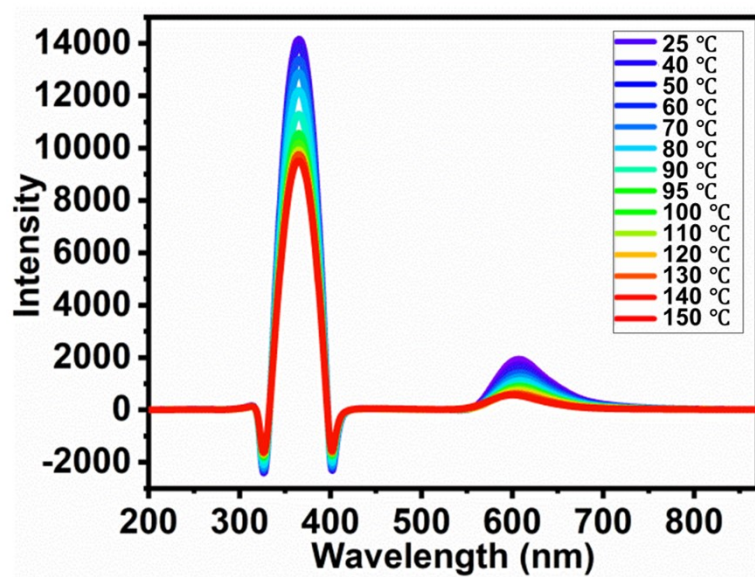

**Figure S8** Fluorescence spectra of PC<sub>1</sub>VF<sub>1</sub> in full wave band at different temperatures.
